# Supplementary material for: Usability of myfood24 Healthcare and Mathematical Diet Optimisation in Clinical Populations: A Pilot Feasibility Randomised Controlled Trial
Source: MDPI journal article supplement (doi:10.3390/nu14091768), 2022-04-23
Supplement: s1 [file s1]

Supplementary Materials:

# Usability of myfood24 Healthcare and Mathematical Diet Optimisation in Clinical Populations: A Pilot Feasibility Randomised Controlled Trial

Diane E. Threapleton <sup>1</sup>, Sarah L. Beer <sup>2</sup>, Dustin J. Foley <sup>1,3</sup>, Lauren E. Gibson <sup>2</sup>, Sarah Trevillion <sup>4</sup>, Dermot Burke <sup>5</sup>, Pete Wheatstone <sup>1</sup>, Jacqui Gath <sup>1</sup>, Nick Hex <sup>6</sup>, Jo Setters <sup>6</sup>, Darren C. Greenwood <sup>3,7</sup> and Janet E. Cade <sup>1,2,\*</sup>

Table S1. Example dietary change suggestions.

| Example number | Food description                             | Suggested change | Recorded in-take | Suggested in-take | Standard portion |
|----------------|----------------------------------------------|------------------|------------------|-------------------|------------------|
| 1              | Potato chips, microwaved                     | Add food         | 0g               | 153g              | 165g             |
| 1              | Tea, white                                   | Remove food      | 520ml            | 0ml               | 170ml            |
| 1              | Potato chips, fried, takeaway                | Remove food      | 153g             | 0g                | 210g             |
| 1              | Ice cream, vanilla                           | Remove food      | 98.8ml           | 0ml               | 30ml             |
| 2              | Eggs, chicken, scrambled                     | Eat less         | 113.5g           | 56.8g             | 25g              |
| 3              | Cola drink                                   | Eat less         | 500ml            | 250ml             | 330ml            |
| 3              | Supermarket brand Beef Chilli                | Eat less         | 300g             | 150g              | 300g             |
| 3              | Chocolate bar                                | Remove food      | 55g              | 0g                | 64.5g            |
| 3              | Bolognese sauce with meat, homemade          | Eat less         | 116g             | 58g               | 240g             |
| 3              | Luxury Hot Cross Buns                        | Remove food      | 156g             | 0g                | 312g             |
| 3              | Yogurt, Greek style, plain                   | Remove food      | 150g             | 0g                | 200g             |
| 3              | Unsalted Butter                              | Remove food      | 10g              | 0g                | 10g              |
| 4              | Mayonnaise                                   | Eat less         | 21g              | 10.5g             | 28g              |
| 4              | All Butter Croissants                        | Remove food      | 71g              | 0g                | 71g              |
| 4              | 70% Dark Chocolate                           | Remove food      | 60g              | 0g                | 100g             |
| 5              | Supermarket brand Beef Lasagne               | Eat more         | 350g             | 700g              | 350g             |
| 5              | Nutty Muesli                                 | Eat more         | 50g              | 75g               | 50g              |
| 5              | Caffe Mocha Coconut                          | Remove food      | 455ml            | 0ml               | 227ml            |
| 5              | Vanilla Flavour Yogurt Drink                 | Remove food      | 250ml            | 0ml               | 375ml            |
| 5              | Chocolate bar                                | Remove food      | 40g              | 0g                | 40g              |
| 5              | Butter, salted                               | Remove food      | 12g              | 0g                | 250g             |
| 6              | Cabernet Sauvignon                           | Eat less         | 500ml            | 250ml             | 125ml            |
| 6              | Bacon And Egg Roll                           | Eat more         | 194g             | 388g              | 194g             |
| 6              | Pie, Cottage, homemade                       | Eat more         | 236.2g           | 354.2g            | 310g             |
| 6              | Fruit cordial                                | Remove food      | 330ml            | 0ml               | 375ml            |
| 6              | Pain Aux Raisins                             | Remove food      | 120g             | 0g                | 120g             |
| 6              | Chocolate bar                                | Remove food      | 40g              | 0g                | 40g              |
| 6              | Lemon Curd                                   | Remove food      | 15g              | 0g                | 15g              |
| 7              | Bread, white, sliced                         | Eat more         | 98g              | 196g              | 31g              |
| 7              | Eggs, chicken, whole, fried in sunflower oil | Eat more         | 180g             | 270g              | 60g              |
| 7              | Pears, raw, flesh and skin                   | Eat more         | 160g             | 240g              | 160g             |
| 7              | Stuffed Crust Meat Feast Pizza               | Remove food      | 237g             | 0g                | 475g             |
| 7              | Butter, spreadable 75-80% fat                | Remove food      | 20g              | 0g                | 250g             |

Note, brand information has been removed.
